**TITLE:** THE ADDITIVE CONTRIBUTION OF N<sub>2</sub>O TO HALOTHANE MAC IN INFANTS AND CHILDREN  
**AUTHORS:** D.J. Murray, M.D., M.P. Mehta, M.D., R.B. Forbes, M.D., D.L. Dull, M.D.  
**AFFILIATION:** Anes. Dept., University of Iowa College of Medicine, Iowa City, IA 52242

The purpose of this study was to define the contribution of N<sub>2</sub>O to halothane MAC in infants and children and to determine whether N<sub>2</sub>O contributes to MAC in an additive manner as suggested by clinical studies in adults or in a non-linear fashion as determined in a study by Cole.<sup>1,2</sup>

Fifty-one infants and small children (14.7 ± 7.2 months) were studied to determine the MAC of halothane in O<sub>2</sub> (n=11) and in the presence of three different N<sub>2</sub>O concentrations [25% (n=13), 50% (n=13) and 75% (n=14)].

Following endotracheal intubation under deep halothane anesthesia, nitrous oxide end-expired concentrations were maintained at 0, 25, 50 or 75 vol % concentrations, and the halothane concentrations were decreased to predetermined levels to assess MAC. End-tidal gases were measured and recorded from a separate distal sampling port of an endotracheal tube during controlled ventilation (Perkin-Elmer Mass Spectrometer®). Analysis of variance was used to assess differences between groups. Results are expressed as mean ± SD.

The mean duration of constant end-tidal concentrations prior to skin incision was 10 ± 3 minutes. The MAC value for halothane in O<sub>2</sub> was 0.92 ± 0.08 vol %. The MAC of halothane in presence of 25%, 50% and 75% N<sub>2</sub>O was 0.78 ± 0.12 vol %, 0.44 ± 0.10 vol % and 0.29 ± 0.06 vol %, respectively. A regression analysis through all four data points yielded a linear

relationship ( $r^2 = 0.87$ ). A predicted MAC for N<sub>2</sub>O was 105 vol %.

While anesthetic requirements for halothane and isoflurane in infants and children are increased compared to adults, the predicted MAC of N<sub>2</sub>O in infants and children (105%) is similar to predicted as well as the measured N<sub>2</sub>O MAC in adults. Unlike the study by Cole et al., the contribution of N<sub>2</sub>O to MAC in children is additive and linear. This linear contribution supports prior clinical studies measuring the contribution of one or two concentrations of N<sub>2</sub>O to the MAC of volatile anesthetics. **References**

1. Anesth Analg 68:551-555, 1989
2. Anesth Analg 68:556-562, 1989

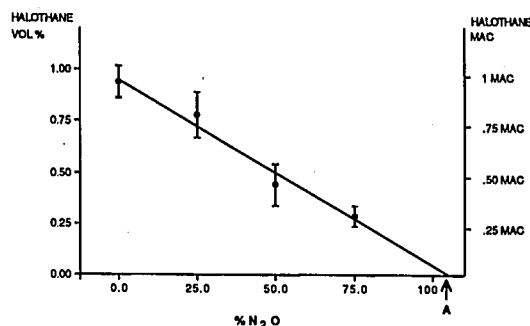

Regression analysis of four data points for Halothane MAC predict MAC of N<sub>2</sub>O at "A" is 105 vol % ( $r^2=0.87$ ).

**TITLE:** INCIDENCE OF BLOODY TAPS (BT) DURING PEDIATRIC CAUDAL BLOCKADE.

**AUTHORS:** L VAN OBERGHE, F VEYCKEMANS, JM GOUVERNEUR.

**AFFILIATION:** Dept of Anesthesiology, UCL Medical School, St Luc Hospital, 1200 Brussels, BELGIUM.

We prospectively collected the data of all pediatric Caudal Blocks (CB) performed in our hospital from August 1986 to September 1989 on a computerized protocol in order to evaluate the influence of Body Weight (BW) and of the Anesthesiologist's Experience (AE) on the incidence of BT.

**Methods:** Except for 22 high risk ex-preemies, all the blocks were performed under halothane or isoflurane anesthesia after premedication with atropine. Age, BW, Number of attempts required to enter the caudal space (First attempt= 1stA, 2 to 5 = 2-5 A, taken over by the consultant= TOC), AE (quoted as the number of CB previously performed: <10, 10 to 20, >20), the eventual occurrence of Bloody Tap (BT) and of a Systemic Reaction (SR) defined as a brisk onset tachycardia (heart rate increase > 20 BPM) during or shortly after the CB were recorded. As we use local anesthetic solutions containing 1/200,000 Epinephrine a SR is the result of a total or partial IV injection. Chi Square test, with Yates correction where appropriate, is used to assess the significance of the differences between the groups.

**Results:** A total of 1.100 blocks were performed :

- 203 in neonates and infants ≤ 5 kg (82 ex preemies) (group 1)
- 260 in children > 5 - ≤ 10 kg (group 2)
- 300 in children > 10 - ≤ 15 kg (group 3)
- 337 in children > 15 kg (group 4)

There were 76 BT (6.9%). A total of 8 S.R. (0.72%) were observed which were all short lived and responded quickly to hyperventilation with oxygen

Two occurred despite repositioning the needle after a previous B.T. but 6 occurred without any previous evidence of blood and were thus classified as Concealed Bloody Tap (CBT); moreover all occurred in children ≤ 10 kg. CBT + BT = 82 (8.2%) is therefore the Total Bloody Tap number (TBT). As shown in table 2 the number of attempts required to enter the caudal space and the incidence of BT decreased with increasing AE.

Table 1 : Incidence of bloody taps

|      | Group 1 | Group 2 | Group3 | Group4 | Total |
|------|---------|---------|--------|--------|-------|
| BT n | 14      | 8*      | 22     | 32     | 76    |
| %    | 6,8     | 3,1     | 7,3    | 9,4    | 6,9   |
| CBT  | 3       | 3       | -      | -      | 6     |
| TBT  | 17      | 11      | 22     | 3      | 82    |
| %    | 8.3     | 4.2     | 7.3    | 9.4    | 8.2   |

Table 2: Influence of the anesthesiologist's experience (AE)

| AE       | <10        | 10-20      | >20CB        |
|----------|------------|------------|--------------|
| n° of CB | 184        | 210        | 704          |
| 1st A    | 94(51%)**  | 122(58%)** | 494(70,2%)** |
| 2-5 A    | 42(23%)    | 61(29%)    | 162(23%)     |
| TOC      | 48(26%)**  | 27(13%)**  | 48(6,8%)**   |
| BT       | 21(11,4%)* | 17(8,1%)*  | 38(5,4%)*    |

\* p < 0,05 \*\* p < 0,005

**Conclusions:** Our incidence of BT and SR is comparable to those of Dalens (1) when using an IM needle. The TBT incidence is not influenced by BW. But in children ≤ 10 kg 1 in 5 TBT is a CBT : this is a strong argument for the systematic use of epinephrine containing LA solutions. Less attempts are needed to enter the caudal space when AE increases. CB being a blind technique, the decreasing incidence of BT when AE increases is probably due to less attempts being needed rather than to experience per se.

Reference: Anesth Analg 1989, 68: 83-89
